# Supplementary material for: Src-transformed cells hijack mitosis to extrude from the epithelium
Source: PubMed Central journal article supplement (PMC6224566; doi:10.1038/s41467-018-07163-4), 2018-11-08
Supplement: 41467_2018_7163_MOESM3_ESM.pdf [file 41467_2018_7163_MOESM3_ESM.pdf]

## **Supplementary Movies**

**Supplementary Movie 1. Time-lapse imaging of vSrc cell extrusion from the EVL of the zebrafish embryo.** Transgenic embryos obtained from a line expressing an RFP-actin marker (red) specifically in the EVL (Krt18:Lifeact-Ruby) line crossed with the Krt18:KalTA4-ERT2 line were injected with the UAS:EGFP-vSrc construct (green). Movies were taken over 4 hours.

**Supplementary Movie 2. Time-lapse imaging of vSrc cell extrusion (xz view).** The surface function was used to segment GFP-positive Src cells over time using the Imaris software. In this cross section of the embryo, a cell is undergoing an apico-basal split.

**Supplementary Movie 3. Time-lapse imaging of Anillin-GFP in mitosis.** Embryos were injected with the dUAS:myr-Cherry;Anillin-GFP construct. Movies were taken over 4 hours.

**Supplementary Movie 4. Time-lapse imaging of Anillin-GFP during Src cell extrusion.** Embryos were injected with the dUAS:myr-Cherry-vSrc;Anillin-GFP construct. Movies were taken over 4 hours.

**Supplementary Movie 5 and 6. Time-lapse imaging of H2B-GFP in mitosis and extrusion.** Embryos were injected with the dUAS:myr-Cherry-vSrc;H2B-GFP construct. Movies were taken over 4 hours. Movies represent merged channels (5) and green channel only (6).

**Supplementary Movie 7 and 8. Time-lapse imaging of CyclinB1-GFP in cell extrusion.** Transgenic embryos obtained from a line expressing a cell cycle progression marker specifically in the EVL (Krt18:CcnB1-GFP) crossed with the Krt18:KalTA4-ERT2 line were injected with the construct UAS:myr-Cherry (Movie 7) or UAS:myr-Cherry-vSrc (Movie 8). Movies were taken over 8 hours.

**Supplementary Movie 9. Time-lapse imaging of the effect of phospho-mimetic p120-mutEE on the localization of Anillin-GFP in cells arrested at the G2/M transition.** Embryos were injected with a combination of the following constructs: dUAS:Cherry-Wee1;CA-Cdc25 and dUAS:p120-mutEE;AnillinGFP. Movies were taken over 4 hours.

**Supplementary Movie 10. Time-lapse imaging of vSrc-like extrusion induced by coexpression of p120-mutEE, myr-aPKC and the apoptotic inhibitor XIAP in G2/M-arrested cells.** Embryos were injected with a combination of the following constructs: dUAS:Cherry-Wee1;CA-Cdc25, dUAS:p120-mutFF;aPKC-delN and Krt18:XIAP. Movies were taken over 6 hours.

**Supplementary Movie 11. Time-lapse imaging of vSrc-like-cell extrusion in (C) segmented using the Imaris software.** The surface function was used to segment GFP positive cells over time. In this cross section of the embryo (xz view).
